# Supplementary material for: Baseline Plasma Tumor DNA (ctDNA) Correlates with PSA Kinetics in Metastatic Castration-Resistant Prostate Cancer (mCRPC) Treated with Abiraterone or Enzalutamide
Source: MDPI journal article supplement (doi:10.3390/cancers14092219), 2022-04-29
Supplement: s1 [file s1]

## Supplementary materials

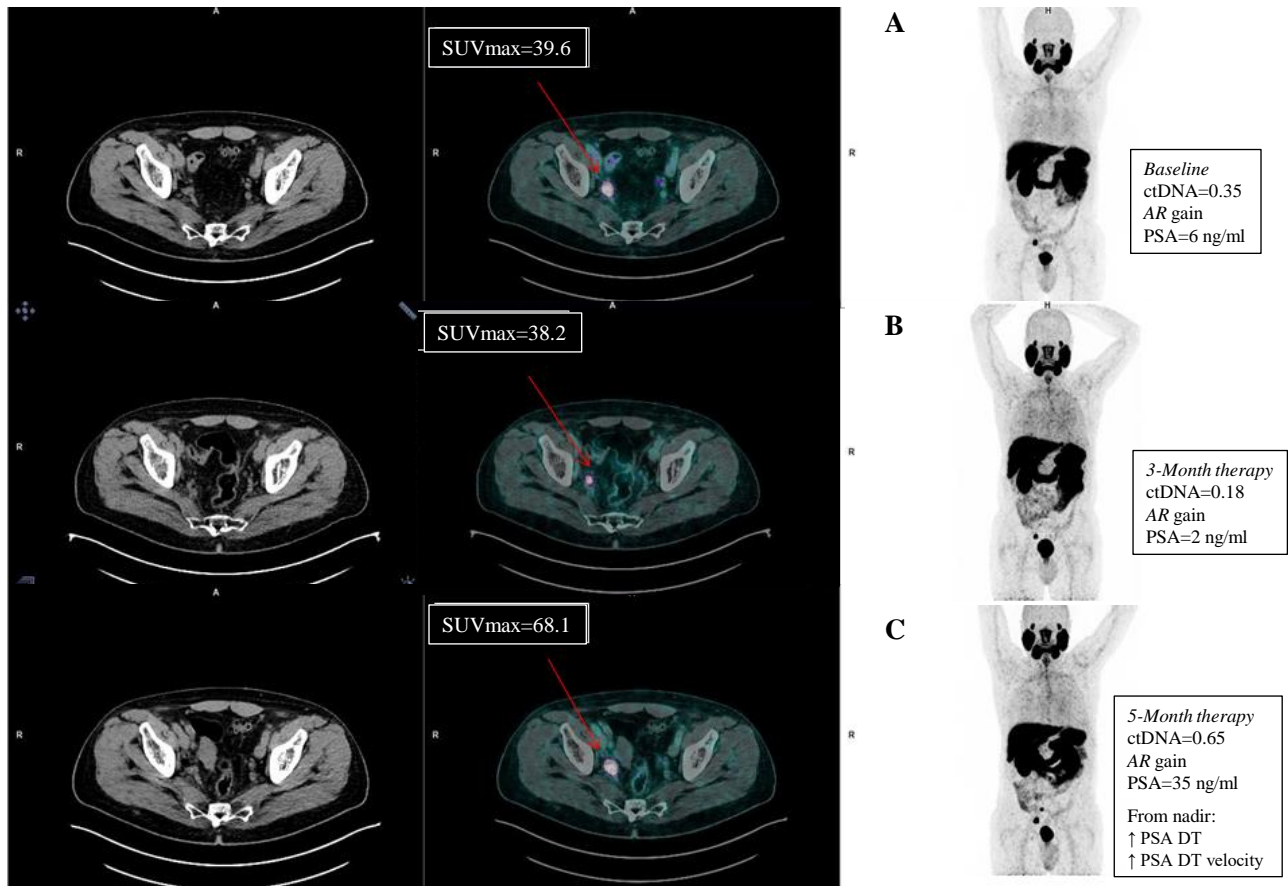

**Figure S1.** A representative case of the association between baseline high ctDNA and AR gain with increased PSA DT and PSA velocity at 5-month abiraterone treatment. Baseline ctDNA high and AR gain correlate with a shorter time to PSA, a faster PSA DT from nadir, as well as a significant higher PSA DT velocity from nadir. This patient belongs to the cohort characterized by a worst prognosis. *Abbreviations:* AR, androgen receptor; PSA DT, prostate specific antigen doubling time; ctDNA, plasma tumor DNA.

**Table S1.** Univariate analysis of PFS and OS

|                                                            | PFS                 |         | OS                  |         |
|------------------------------------------------------------|---------------------|---------|---------------------|---------|
|                                                            | HR (95% CI)         | p       | HR (95% CI)         | p       |
| <b>logPSA</b> (continuous variable)                        | 1.23 (1.14-1.32)    | <0.0001 | 1.25 (1.16-1.35)    | <0.0001 |
| <b>Age</b> ( $\geq 74$ vs $<74$ )                          | 1.03 (0.79-1.35)    | 0.803   | 0.98 (0.74-1.29)    | 0.881   |
| <b>Bone metastasis</b> (yes vs no)                         | 1.35 (0.91-2.01)    | 0.135   | 1.60 (1.05-2.45)    | 0.030   |
| <b>Lymph nodes metastasis</b><br>(yes vs no)               | 1.01 (0.76-1.32)    | 0.978   | 0.92 (0.70-1.22)    | 0.586   |
| <b>Visceral metastasis</b> (yes vs no)                     | 1.87 (1.30-2.68)    | 0.0007  | 2.47 (1.71-3.58)    | <0.0001 |
| <b>Liver metastasis</b> (yes vs no)                        | 2.59 (1.56-4.30)    | 0.0002  | 3.17 (1.89-5.32)    | <0.0001 |
| <b>Lung metastasis</b> (yes vs no)                         | 1.24 (0.73-2.11)    | 0.416   | 1.73 (1.02-2.93)    | 0.043   |
| <b>Other metastasis</b> (yes vs no)                        | 1.66 (0.90-3.07)    | 0.104   | 1.96 (1.06-3.62)    | 0.032   |
| <b>Previous therapy</b> (enza vs abi)                      | 1.47 (1.11-1.94)    | 0.007   | 1.20 (0.90-1.59)    | 0.220   |
| <b>Previous chemotherapy</b><br>(yes vs no)                | 1.98 (1.46-2.68)    | <0.0001 | 2.11 (1.53-2.90)    | <0.0001 |
| <b>Prostatectomy</b> (yes vs no)                           | 0.71 (0.54-0.94)    | 0.015   | 0.76 (0.57-1.01)    | 0.055   |
| <b>Radioterapy</b> (yes vs no)                             | 1.01 (0.74-1.38)    | 0.940   | 1.03 (0.74-1.42)    | 0.859   |
| <b>ECOG PS</b> (2 vs 0-1)                                  | 3.26 (1.91-5.57)    | <0.0001 | 5.88 (3.39-10.22)   | <0.0001 |
| <b>Gleason score</b> ( $\geq 8$ vs 6-7)                    | 1.10 (0.83-1.47)    | 0.513   | 1.05 (0.78-1.41)    | 0.765   |
| <b>AR CN</b> (Gain vs Normal)                              | 2.66 (1.98-3.58)    | <0.0001 | 3.02 (2.22-4.11)    | <0.0001 |
| <b>ctDNA</b> ( $>0.180$ vs $\leq 0.180$ )                  | 2.41 (1.71-3.38)    | <0.0001 | 2.20 (1.55-3.12)    | <0.0001 |
| <b>ALP</b> ( $\geq 129$ vs $<129$ )                        | 1.83 (1.39-2.42)    | <0.0001 | 2.12 (1.59-2.83)    | <0.0001 |
| <b>Albumin</b> ( $<4$ vs $\geq 4$ )                        | 0.70 (0.53-0.92)    | 0.012   | 0.61 (0.46-0.81)    | 0.0007  |
| <b>Hemoglobin</b> ( $<12.5$ vs $\geq 12.5$ )               | 1.45 (1.08-1.94)    | 0.014   | 1.69 (1.24-2.30)    | 0.0009  |
| <b>CgA</b> ( $\geq 120$ vs $<120$ )                        | 1.49 (1.25-1.78)    | <0.0001 | 1.83 (1.52-2.21)    | <0.0001 |
| <b>LDH</b> ( $\geq 225$ vs $<225$ )                        | 2.61 (1.92-3.56)    | <0.0001 | 2.68 (1.97-3.66)    | <0.0001 |
| <b>NLR</b> ( $\geq 3$ vs $<3$ )                            | 1.50 (1.15-1.96)    | 0.003   | 1.47 (1.11-1.94)    | 0.006   |
| <b>PSA DT from nadir</b><br>(continuous variable)          | 0.92 (0.89-0.96)    | <0.0001 | 0.94 (0.91-0.98)    | 0.002   |
| <b>PSA DT velocity from nadir</b><br>(continuous variable) | 1.001 (1.001-1.002) | <0.0001 | 1.001 (1.001-1.002) | <0.0001 |

*Abbreviations:* ALP, alkaline phosphatase; AR CN, androgen receptor copy number; CgA, chromogranin A; ; ECOG, Eastern Cooperative Oncology Group; LDH, lactate dehydrogenase; NLR, neutrophil-lymphocyte ratio; PS, performance status; PSA DT, prostate specific antigen doubling time; ctDNA, circulating tumor DNA.
